# Supplementary material
Source: PubMed Central journal article supplement (PMC3527711)
Supplement: pro0021-1746-SD1.pdf [file pro0021-1746-SD1.pdf]

**Table S1. Hydrophobicity of transmembrane helix residues for 47 thermophilic and 153 mesophilic membrane proteins**

For resource purposes, the number of TM-helices and TM-helix residues is included in the list.

| Thermophile |          |                 |                         |                         | Mesophile |          |                 |                         |                         |
|-------------|----------|-----------------|-------------------------|-------------------------|-----------|----------|-----------------|-------------------------|-------------------------|
| PDB_ID      | CHAIN_ID | TM_HELIX_NUMBER | TM_HELIX_RESIDUE_NUMBER | TM_HELIX_HYDROPHOBICITY | PDB_ID    | CHAIN_ID | TM_HELIX_NUMBER | TM_HELIX_RESIDUE_NUMBER | TM_HELIX_HYDROPHOBICITY |
| 1EHK        | A        | 13              | 255                     | 0.174913                | 1AIJ      | H        | 1               | 17                      | 0.141765                |
| 1EHK        | B        | 1               | 18                      | 0.258889                | 1AIJ      | L        | 5               | 88                      | 0.067412                |
| 1EHK        | C        | 1               | 18                      | -0.010556               | 1AIJ      | M        | 5               | 90                      | 0.088252                |
| 1JB0        | A        | 11              | 158                     | 0.241408                | 1BCC      | C        | 8               | 132                     | 0.135809                |
| 1JB0        | B        | 11              | 160                     | 0.203635                | 1BCC      | D        | 1               | 15                      | 0.037333                |
| 1JB0        | F        | 1               | 15                      | 0.080667                | 1BCC      | E        | 1               | 18                      | 0.366667                |
| 1JB0        | I        | 1               | 18                      | 0.201111                | 1BCC      | G        | 1               | 15                      | 0.324667                |
| 1JB0        | J        | 1               | 17                      | 0.196471                | 1BCC      | J        | 1               | 17                      | 0.382941                |
| 1JB0        | K        | 2               | 28                      | 0.362813                | 1BGY      | C        | 8               | 178                     | 0.178866                |
| 1JB0        | L        | 3               | 44                      | 0.16875                 | 1BGY      | D        | 1               | 22                      | 0.479545                |
| 1JB0        | M        | 1               | 15                      | -0.046                  | 1BGY      | E        | 1               | 26                      | 0.445769                |
| 1ORQ        | C        | 4               | 105                     | 0.343077                | 1BGY      | G        | 1               | 24                      | 0.53625                 |
| 2B2F        | A        | 11              | 230                     | 0.193286                | 1BGY      | J        | 1               | 26                      | 0.576538                |
| 2F2B        | A        | 6               | 108                     | 0.097967                | 1BGY      | K        | 1               | 15                      | 0.302667                |
| 2ONK        | C        | 6               | 115                     | 0.227501                | 1FFT      | A        | 12              | 190                     | 0.138599                |
| 2QJU        | A        | 12              | 280                     | 0.235452                | 1FFT      | B        | 2               | 31                      | -0.102771               |
| 2VPZ        | C        | 8               | 136                     | 0.121472                | 1FFT      | C        | 5               | 73                      | 0.197525                |
| 2ZY9        | A        | 5               | 112                     | 0.360715                | 1KPL      | A        | 10              | 205                     | 0.373645                |
| 3AQP        | A        | 12              | 204                     | 0.167731                | 1KQF      | B        | 1               | 19                      | 0.114211                |
| 3ARC        | A        | 5               | 85                      | 0.303773                | 1KQF      | C        | 4               | 82                      | 0.218762                |
| 3ARC        | B        | 6               | 96                      | 0.151424                | 1LOV      | C        | 3               | 67                      | 0.338788                |
| 3ARC        | C        | 6               | 96                      | 0.18335                 | 1LOV      | D        | 3               | 73                      | 0.229554                |
| 3ARC        | D        | 5               | 87                      | 0.249213                | 1LGH      | A        | 1               | 19                      | 0.076316                |
| 3ARC        | E        | 1               | 15                      | 0.222                   | 1LGH      | B        | 1               | 20                      | 0.1605                  |
| 3ARC        | F        | 1               | 17                      | 0.347059                | 1NEK      | C        | 3               | 65                      | 0.193821                |
| 3ARC        | H        | 1               | 16                      | -0.128125               | 1NEK      | D        | 3               | 66                      | 0.082965                |
| 3ARC        | I        | 1               | 17                      | -0.203529               | 1NKZ      | A        | 1               | 18                      | 0.130556                |
| 3ARC        | J        | 1               | 15                      | -0.032667               | 1NKZ      | B        | 1               | 18                      | 0.188889                |
| 3ARC        | K        | 1               | 15                      | 0.040667                | 1PW4      | A        | 12              | 253                     | 0.283041                |
| 3ARC        | L        | 1               | 16                      | -0.185625               | 1Q16      | C        | 5               | 115                     | 0.288622                |
| 3ARC        | M        | 1               | 16                      | -0.08875                | 1Q90      | A        | 1               | 16                      | 0.0925                  |
| 3ARC        | T        | 1               | 16                      | -0.311875               | 1Q90      | B        | 4               | 74                      | 0.126512                |
| 3ARC        | X        | 1               | 17                      | -0.047059               | 1Q90      | D        | 3               | 50                      | 0.065185                |
| 3ARC        | Y        | 1               | 15                      | 0.055333                | 1Q90      | G        | 1               | 16                      | 0.028125                |
| 3ARC        | Z        | 2               | 34                      | -0.055764               | 1Q90      | L        | 1               | 21                      | 0.041429                |
| 3B4R        | A        | 6               | 103                     | 0.086802                | 1Q90      | M        | 1               | 18                      | -0.042778               |
| 3BVD        | A        | 13              | 268                     | 0.134538                | 1Q90      | N        | 1               | 16                      | 0.080625                |
| 3BVD        | B        | 1               | 18                      | 0.258889                | 1Q90      | R        | 1               | 17                      | 0.230588                |
| 3BVD        | C        | 1               | 18                      | -0.191667               | 1QO1      | K        | 2               | 29                      | 0.108167                |
| 3DIN        | C        | 10              | 151                     | 0.157635                | 1U7G      | A        | 11              | 212                     | 0.20337                 |
| 3DIN        | D        | 1               | 17                      | 0.048235                | 1V54      | A        | 12              | 192                     | 0.154004                |
| 3DIN        | E        | 2               | 28                      | 0.384923                | 1V54      | B        | 2               | 29                      | -0.016929               |
| 3GIA        | A        | 12              | 213                     | 0.066611                | 1V54      | C        | 7               | 101                     | 0.238267                |
| 3KBC        | A        | 11              | 183                     | 0.316812                | 1V54      | D        | 1               | 18                      | 0.060556                |

|      |   |    |
|------|---|----|
| 3MP7 | A | 10 |
| 3MP7 | B | 1  |
| 3ORG | A | 12 |

|     |          |
|-----|----------|
| 168 | 0.166411 |
| 21  | 0.128571 |
| 220 | 0.271132 |

|                       |             |
|-----------------------|-------------|
| <b>Average</b>        | 0.125694021 |
| <b>Standard Error</b> | 0.024179883 |

|      |   |    |     |           |
|------|---|----|-----|-----------|
| 1V54 | G | 1  | 17  | 0.311765  |
| 1V54 | I | 1  | 14  | 0.126429  |
| 1V54 | J | 1  | 17  | 0.187059  |
| 1V54 | K | 1  | 16  | 0.066875  |
| 1V54 | L | 1  | 14  | 0.122143  |
| 1V54 | M | 1  | 15  | 0.141333  |
| 1YEW | A | 2  | 32  | 0.029062  |
| 1YEW | B | 7  | 117 | 0.407692  |
| 1YEW | C | 4  | 65  | 0.330175  |
| 1ZCD | A | 12 | 210 | 0.138785  |
| 1ZOY | C | 3  | 74  | 0.373573  |
| 1ZRT | C | 8  | 137 | 0.112144  |
| 1ZRT | D | 1  | 16  | -0.068125 |
| 1ZRT | E | 1  | 21  | 0.281905  |
| 2A79 | B | 4  | 68  | 0.245788  |
| 2ACZ | C | 3  | 71  | 0.168249  |
| 2ACZ | D | 3  | 75  | 0.068279  |
| 2BHW | A | 3  | 57  | 0.511367  |
| 2BL2 | A | 4  | 74  | 0.210917  |
| 2BS2 | C | 5  | 125 | 0.27872   |
| 2C3E | A | 6  | 165 | 0.674609  |
| 2E74 | A | 4  | 78  | 0.071123  |
| 2E74 | B | 3  | 52  | 0.072179  |
| 2E74 | C | 1  | 18  | -0.017778 |
| 2E74 | D | 1  | 18  | 0.171111  |
| 2E74 | E | 1  | 19  | -0.172105 |
| 2E74 | F | 1  | 20  | -0.008    |
| 2E74 | G | 1  | 18  | 0.214444  |
| 2E74 | H | 1  | 17  | -0.044118 |
| 2E14 | A | 7  | 131 | 0.234162  |
| 2EXW | A | 10 | 177 | 0.310242  |
| 2GSM | A | 12 | 252 | 0.212586  |
| 2GSM | B | 2  | 38  | -0.075833 |
| 2H8A | A | 4  | 83  | 0.414768  |
| 2J58 | A | 1  | 20  | 0.914737  |
| 2JLN | A | 10 | 186 | 0.275618  |
| 2NUU | A | 11 | 219 | 0.193557  |
| 2O01 | 1 | 3  | 46  | 0.649259  |
| 2O01 | 2 | 3  | 47  | 0.580902  |
| 2O01 | 3 | 3  | 41  | 0.308132  |
| 2O01 | A | 11 | 160 | 0.231956  |
| 2O01 | B | 11 | 161 | 0.249613  |
| 2O01 | F | 1  | 15  | 0.054667  |
| 2O01 | G | 2  | 26  | 0.564231  |
| 2O01 | H | 1  | 15  | 0.183333  |
| 2O01 | I | 1  | 16  | 0.190625  |
| 2O01 | J | 1  | 14  | 0.050714  |
| 2O01 | L | 3  | 46  | 0.215333  |
| 2O7L | A | 6  | 101 | 0.160704  |

|      |   |    |     |           |
|------|---|----|-----|-----------|
| 2OAR | A | 2  | 52  | 0.279978  |
| 2OAU | A | 3  | 61  | 0.22841   |
| 2Q7M | A | 4  | 84  | 0.517405  |
| 2QI9 | A | 10 | 135 | 0.085219  |
| 2QKS | A | 2  | 51  | 0.185685  |
| 2QTS | A | 2  | 45  | 0.258488  |
| 2RCR | H | 1  | 18  | 0.162778  |
| 2RCR | L | 5  | 91  | 0.092332  |
| 2RCR | M | 5  | 87  | 0.226633  |
| 2RDD | A | 12 | 205 | 0.033463  |
| 2RDD | B | 1  | 24  | 0.33625   |
| 2V8N | A | 12 | 266 | 0.244693  |
| 2W5J | A | 2  | 45  | 0.299762  |
| 2WCD | A | 3  | 67  | 0.982339  |
| 2WSW | A | 12 | 223 | 0.236314  |
| 2X2V | A | 2  | 27  | 0.003571  |
| 2XUT | A | 14 | 264 | 0.292559  |
| 2YFY | A | 10 | 193 | 0.348052  |
| 2ZUQ | A | 4  | 69  | 0.10576   |
| 2ZW3 | A | 4  | 96  | 0.521657  |
| 2ZXE | A | 10 | 177 | 0.285934  |
| 2ZXE | B | 1  | 21  | 0.054286  |
| 2ZXE | G | 1  | 16  | -0.250625 |
| 3B9W | A | 11 | 211 | 0.195828  |
| 3B9Y | A | 11 | 220 | 0.196564  |
| 3CHX | A | 2  | 30  | 0.117667  |
| 3CHX | B | 7  | 105 | 0.413395  |
| 3CHX | C | 4  | 59  | 0.35331   |
| 3CX5 | C | 8  | 196 | 0.204712  |
| 3CX5 | D | 1  | 20  | 0.223     |
| 3CX5 | E | 1  | 27  | 0.396667  |
| 3CX5 | H | 1  | 28  | 0.8725    |
| 3CX5 | I | 1  | 22  | 0.259091  |
| 3D31 | C | 6  | 117 | 0.19787   |
| 3DQB | A | 7  | 172 | 0.337267  |
| 3EHZ | A | 4  | 79  | 0.168862  |
| 3FH6 | F | 7  | 138 | 0.195945  |
| 3FH6 | G | 6  | 125 | 0.25364   |
| 3G5U | A | 12 | 242 | 0.248994  |
| 3H90 | A | 6  | 142 | 0.345385  |
| 3HD6 | A | 12 | 226 | 0.242375  |
| 3K07 | A | 12 | 225 | 0.140691  |
| 3KCU | A | 7  | 160 | 0.271605  |
| 3KG2 | A | 4  | 71  | 0.135393  |
| 3KP9 | A | 5  | 105 | 0.102232  |
| 3LRB | A | 12 | 217 | 0.156821  |
| 3LUT | B | 6  | 118 | 0.241532  |
| 3M71 | A | 10 | 181 | 0.231295  |
| 3MK7 | A | 12 | 195 | 0.173307  |

|      |   |    |     |           |
|------|---|----|-----|-----------|
| 3MK7 | B | 1  | 14  | -0.084286 |
| 3MK7 | C | 2  | 30  | -0.033    |
| 3MKT | A | 12 | 235 | 0.235618  |
| 3O7Q | A | 12 | 246 | 0.239133  |
| 3P0G | A | 7  | 181 | 0.296546  |
| 3PJZ | A | 12 | 256 | 0.232768  |
| 3QAK | A | 7  | 144 | 0.216174  |
| 3QE7 | A | 14 | 230 | 0.311305  |
| 3QNQ | A | 10 | 166 | 0.188789  |
| 3RLB | A | 6  | 113 | 0.171894  |
| 3S0X | A | 6  | 118 | 0.355127  |

|                       |            |
|-----------------------|------------|
| <b>Average</b>        | 0.21966601 |
| <b>Standard Error</b> | 0.01481883 |
